# Supplementary material
Source: Springer Nature journal article supplement (https://www.springermedizin.de/resource/supplementary/12936_2013_3152_MOESM1_ESM.pdf/9546286)
Supplement: MOESM1 [file 9546286]

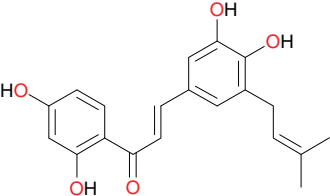

5-Prenylbutein (1)

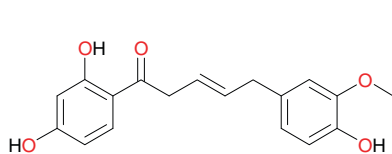

Homobutein (2)

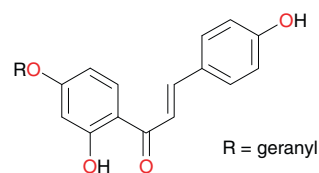

4'-O-geranylisoquiritigenin (3)

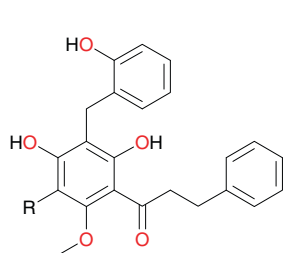

Uvaretin (4): R = H

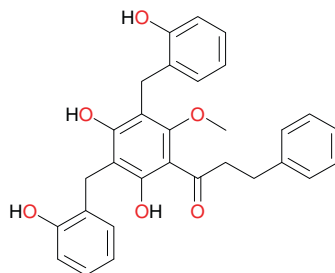

Diuvaretin (5)

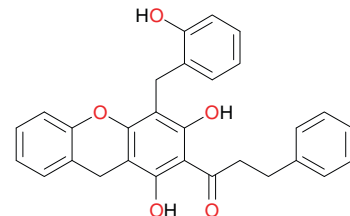

Chamuvaretin (6)

6-Hydroxy-3-methoxy-4-oxapyren-5-one (15): R = CH<sub>3</sub>

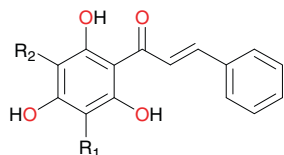

3',5'-Diformyl-2',4',6'-trihydroxychalcone (7): R<sub>1</sub> = CHO, R<sub>2</sub> = CHO

3',5'-Dimethyl-2',4',6'-trihydroxychalcone (8): R<sub>1</sub> = CH<sub>3</sub>, R<sub>2</sub> = CH<sub>3</sub>

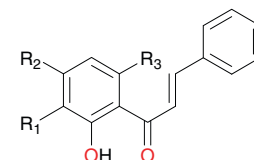

(9): R<sub>1</sub> = R<sub>3</sub> = OMe, R<sub>2</sub> = OH

(10): R<sub>1</sub> = H, R<sub>2</sub> = R<sub>3</sub> = OMe

(11): R<sub>1</sub> = H, R<sub>2</sub> = OH, R<sub>3</sub> = OMe

(12): R<sub>1</sub> = R<sub>2</sub> = OMe, R<sub>3</sub> = OH

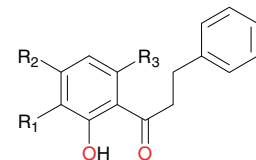

(13): R<sub>1</sub> = H, R<sub>2</sub> = OMe, R<sub>3</sub> = OH

(14): R<sub>1</sub> = R<sub>2</sub> = OMe, R<sub>3</sub> = OH

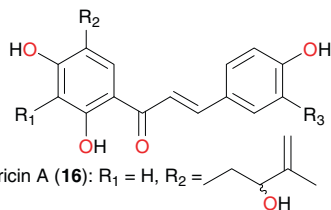

Bartericin A (16): R<sub>1</sub> = H, R<sub>2</sub> = prenyl, R<sub>3</sub> = prenyl

R<sub>3</sub> = Prenyl

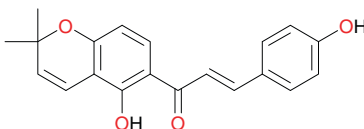

4-Hydroxyxlonchocarpin (17)

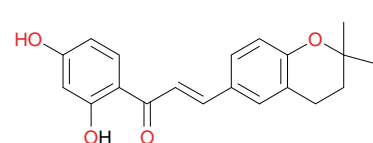

Kanzonol B (19)

Stipulin (18): R<sub>1</sub> = H, R<sub>2</sub> = Prenyl, R<sub>3</sub> = Prenyl
